# Supplementary material
Source: PubMed Central journal article supplement (PMC8939001)
Supplement: NIHMS1785169-supplement-SI.pdf [file NIHMS1785169-supplement-SI.pdf]

## Supporting Information:

### **Temperature Regulates Stability, Ligand Binding (Mg<sup>2+</sup> and ATP) and Stoichiometry of GroEL/GroES Complexes**

Thomas E. Walker,<sup>1</sup> Mehdi Shirzadeh,<sup>1</sup> He Mirabel Sun,<sup>1</sup> Jacob W. McCabe,<sup>1</sup> Andrew Roth,<sup>2</sup> Zahra Moghadamchargari,<sup>1</sup> David E. Clemmer<sup>3</sup>, Arthur Laganowsky<sup>1</sup>, Hays Rye,<sup>2</sup> David. H. Russell<sup>1\*</sup>

<sup>1</sup>Department of Chemistry, Texas A&M University, College Station, Texas 77843

<sup>2</sup>Department of Biochemistry and Biophysics, Texas A&M University, College Station, Texas 77843

<sup>3</sup>Department of Chemistry, Indiana University, Bloomington, Indiana 47401

\*Corresponding author: russell@chem.tamu.edu

## Table of Contents:

|                                                                     |    |
|---------------------------------------------------------------------|----|
| Figure S1: <b>Temperature stability of GroEL<sub>14</sub></b> ..... | S2 |
| Figure S2: <b>ATP binding is favored at low temperatures</b> .....  | S2 |
| Calculation of Association Constants (K <sub>a</sub> ).....         | S3 |
| References.....                                                     | S3 |

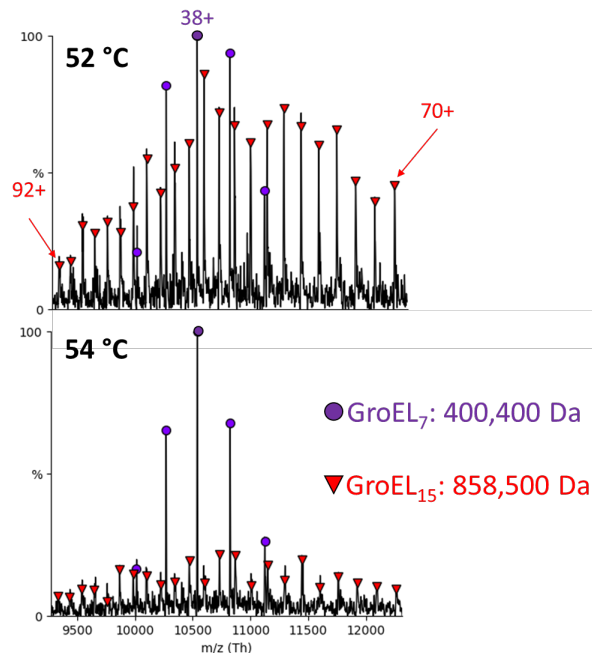

**Figure S1. Temperature stability of GroEL<sub>14</sub>.** Mass spectra (Figure 2) of GroEL acquired at 52 and 54 °C provide evidence for thermal decomposition of GroEL<sub>14</sub>. The most abundant signals in the m/z range from ~9,000 to 12,500 are assigned to GroEL<sub>7</sub> (36<sup>+</sup> to 40<sup>+</sup>) and a series GroEL<sub>15</sub> ions (charge states 70<sup>+</sup> to 92<sup>+</sup>); mass and charge assignments were initially determined using ProteinMetric Intact Mass™ program. Solution conditions used to acquire the mass spectra differ only in the temperature of the ESI solution. The most abundant ions detected at 52 °C correspond to GroEL<sub>7</sub> (blue circles) and GroEL<sub>15</sub> (red triangles), and at 54 °C the signals for GroEL<sub>7</sub> dominate the spectrum. The GroEL<sub>7</sub> charge state distribution (CSD) is consistent with a native-like heptamer, whereas the CSD for GroEL<sub>15</sub> is broad and consistent with non-native oligomers. The increased relative abundances for GroEL<sub>7</sub> are attribute to a reduction in the abundances GroEL<sub>15</sub> signals at 54 °C spectrum vis-à-vis an increased abundance of GroEL<sub>7</sub>. This assignment is based on comparisons of signal-to-noise ratios of the two spectra. At higher temperatures the signals for GroEL<sub>15</sub> are lower, possibly indicating that higher temperatures promote higher order oligomers that precipitate from solution.

The mass assignments for GroEL<sub>7</sub> and GroEL<sub>14</sub>-GroEL<sub>1</sub> ions is supported by excellent agreement between calculated isotopically averaged mass and experimentally measured mass of 400.47 kDa vs. 400.40 kDa, and 858.5 ± 1 kDa vs. 858.0 kDa, respectively.

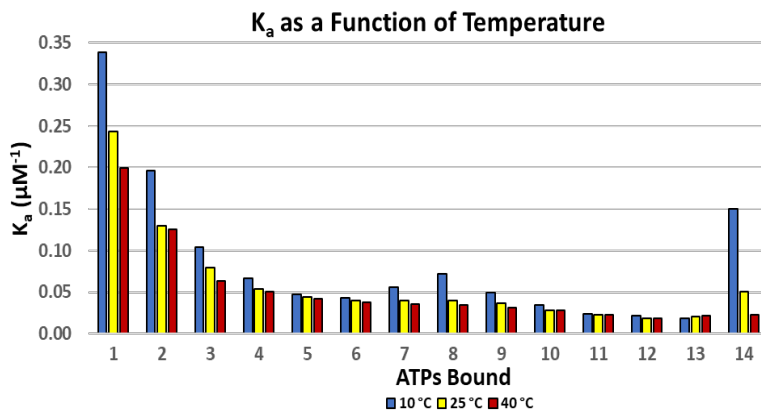

**Figure S2. ATP binding is favored at low temperatures.** Calculated macroscopic association constants (K<sub>a</sub>) for binding of ATP to GroEL 10 °C (blue), 25 °C (yellow), and 40 °C (red). These data show that ATP is more tightly bound at cold solution temperatures and more loosely bound, comparatively, at higher solution temperatures. Note that the 14<sup>th</sup> ATP binds with higher affinity, at cold temperatures, than many of the other preceding binding events.

### ***Calculation of Association Constants ( $K_a$ )***

The association constants were calculated using the equation 1 and then were statistically corrected using equation 2.<sup>1,2</sup> The statistical correction accounts for the number of sites available for a ligand (ATP in this case) to bind or dissociate. Sharon *et al.* discuss these equations in much more detail, especially in the supplemental information.<sup>3</sup>

$$K_i^{app} = \frac{I_i}{I_{i-1}[S]_{free}} \quad (1)$$

$$K_i^{app} = \frac{N-i+1}{i} K_i^{int} \quad (2)$$

Where  $K_i^{app}$  is the apparent binding constant,  $I_i$  is the intensity of the  $i$ th bound ATP,  $I_{i-1}$  is the intensity of the preceding binding, and  $[S]_{free}$  is the free ligand concentration. Where  $N$  is the number of total binding sites,  $i$  is the number of bound ATPs, and  $K_i^{int}$  is the intrinsic binding constant.

### **References:**

1. Garces, J. L.; Rey-Castro, C.; David, C.; Madurga, S.; Mas, F.; Pastor, I.; Puy, J., Model-Independent Link between the Macroscopic and Microscopic Descriptions of Multidentate Macromolecular Binding: Relationship between Stepwise, Intrinsic, and Microscopic Equilibrium Constants. *Journal of Physical Chemistry B* **2009**, *113* (46), 15145-15155.
2. Garces, J. L.; Acerenza, L.; Mizraji, E.; Mas, F., A hierarchical approach to cooperativity in macromolecular and self-assembling binding systems. *J Biol Phys* **2008**, *34* (1-2), 213-35.
3. Dyachenko, A.; Gruber, R.; Shimon, L.; Horovitz, A.; Sharon, M., Allosteric mechanisms can be distinguished using structural mass spectrometry. *Proc Natl Acad Sci U S A* **2013**, *110* (18), 7235-9.
